# Supplementary material
Source: publisher figshare collection journal article supplement (https://acs.figshare.com/ndownloader/files/13292900)
Supplement: Supplementary file 1 [file 13292900]

## Supporting Information

### Hydrophobic Antioxidant Polymers for Corrosion Protection of an Aluminum Alloy

*Hanna Hlushko,<sup>†</sup> Yenny Cubides,<sup>†</sup> Raman Hlushko,<sup>†</sup> Taylor M. Kelly,<sup>‡</sup> Homero Castaneda,<sup>†</sup> and  
Svetlana A. Sukhishvili<sup>\*‡</sup>*

<sup>†</sup>Department of Materials Science and Engineering, Texas A&M University, 575 Ross St.,  
College Station, TX 77843, USA

<sup>‡</sup>Department of Chemical Engineering, Texas A&M University, 717 University Dr., College  
Station, TX 77843, USA

\*Corresponding author e-mail address: svetlana@tamu.edu

Phone: (979) 458-9840

Supporting information contains 4 pages, 4 figures, and 4 tables

**Table S1.** Absorption characteristics of ethanol solutions of various additives

| Additive | $\lambda_{\max}$ , nm | $\epsilon$ , L mol <sup>-1</sup> cm <sup>-1</sup> |
|----------|-----------------------|---------------------------------------------------|
| TA       | 276                   | 77300                                             |
| PHex     | 202                   | 4840                                              |
| P2Hex    | 202                   | 10500                                             |
| P3Hex    | 204                   | 9500                                              |

**Table S2.** Thicknesses of free-standing epoxy coatings used in transparency studies

| Additive                 | TA           | PHex         | P2Hex        | P3Hex       | None         |
|--------------------------|--------------|--------------|--------------|-------------|--------------|
| Thickness, $\mu\text{m}$ | 163 $\pm$ 32 | 177 $\pm$ 27 | 155 $\pm$ 16 | 153 $\pm$ 6 | 234 $\pm$ 16 |

**Table S3.** Potentiodynamic polarization results

| Coating     | $E_{\text{corr}}$ , V | $E_{\text{pit}}$ , V | $i_{\text{corr}}$ , A cm <sup>-2</sup> |
|-------------|-----------------------|----------------------|----------------------------------------|
| Bare AA2024 | -0.71                 | -                    | 4.5 $\times$ 10 <sup>-7</sup>          |
| PHex        | -0.77                 | -0.46                | 2.2 $\times$ 10 <sup>-8</sup>          |
| P2Hex       | -0.92                 | -0.38                | 2.0 $\times$ 10 <sup>-8</sup>          |
| P3Hex       | -0.88                 | -0.41                | 1.4 $\times$ 10 <sup>-8</sup>          |

**Table S4.** Characteristics of epoxy-based coatings deposited on AA2024 substrates

| Additive | Abbreviation | Thickness, $\mu\text{m}$ | RMS Roughness, nm |
|----------|--------------|--------------------------|-------------------|
| None     | Ep           | $120 \pm 12$             | $65 \pm 35$       |
| P2Hex    | EpP2Hex      | $108 \pm 7$              | $729 \pm 165$     |
| P3Hex    | EpP3Hex      | $116 \pm 11$             | $997 \pm 100$     |
| PHex     | EpPHex       | $68 \pm 6$               | $1160 \pm 473$    |

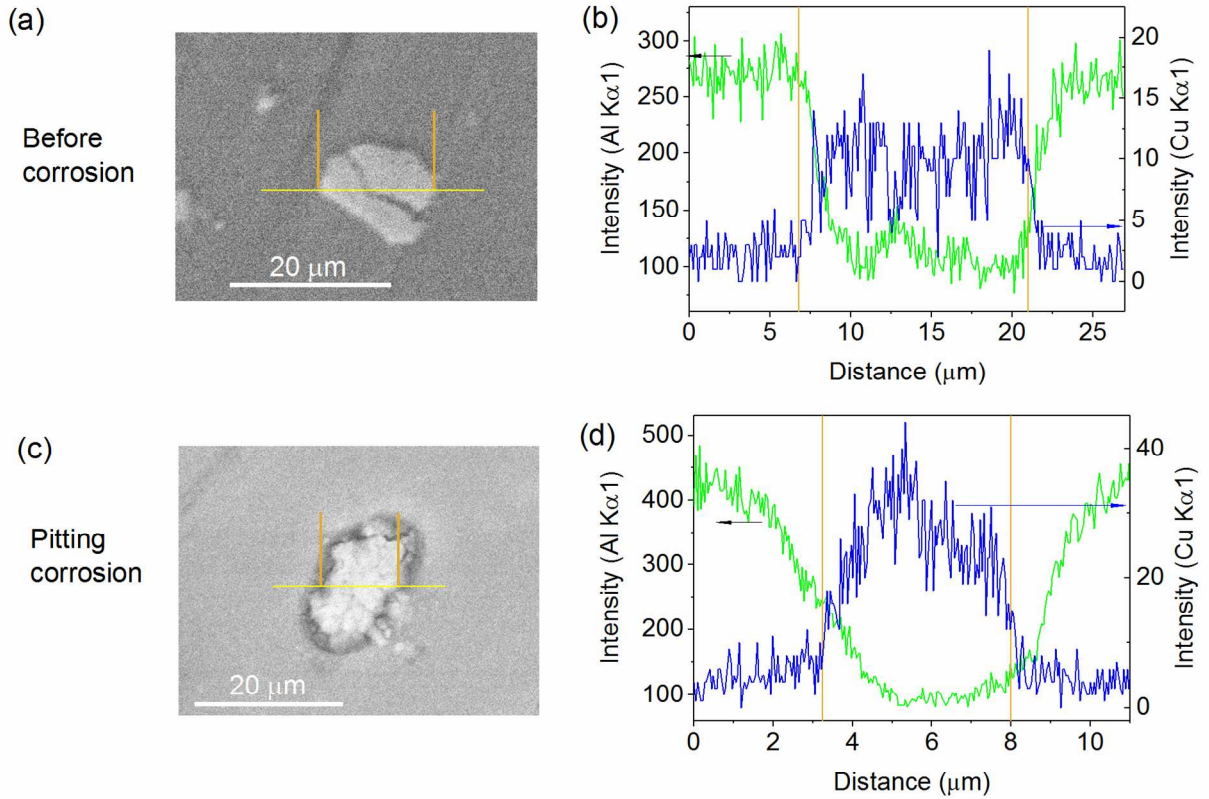

**Figure S1.** SEM images of copper-enriched precipitates of non-corroded (c) and corroded (b) AA2024 substrates with EDS elemental analysis along yellow lines (b and d, respectively).

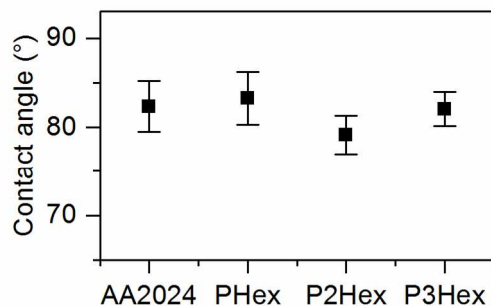

**Figure S2.** Contact angle of polymer-coated as well as bare AA2024 substrates.

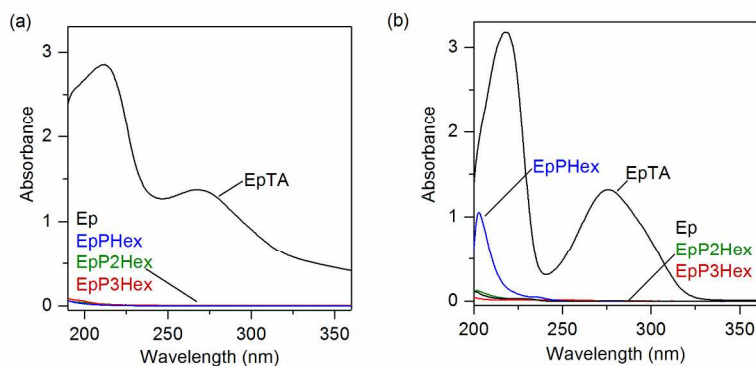

**Figure S3.** Absorbance of water (a) or ethanol (b) extracts from free standing epoxy coatings with different additives measured after 60 days of immersion.

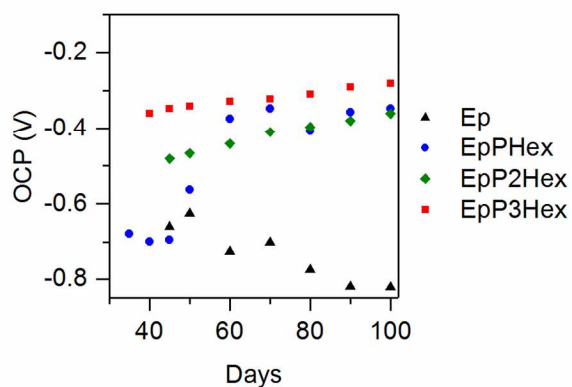

**Figure S4.** Time evolution of OCP for AA2024 substrates covered with the epoxy coatings and immersed in 0.6 M NaCl solution.
